# Supplementary material
Source: PubMed Central journal article supplement (PMC6349468)
Supplement: NIHMS1518557-supplement-1.pdf [file NIHMS1518557-supplement-1.pdf]

**Supplemental Table 1. TaqMan Assays and Primers used for reverse transcription-quantitative PCR (RT-qPCR).**

| <b>Gene Symbol</b> | <b>Reference Sequence</b> | <b>TaqMan Assay ID</b>           |                                  |
|--------------------|---------------------------|----------------------------------|----------------------------------|
| <i>CYP2B6</i>      | NM_000767                 | Hs04183483_g1                    |                                  |
| <i>PLIN2</i>       | NM_001122                 | Hs000605340_m1                   |                                  |
| <i>NROB2 (SHP)</i> | NM_021969                 | Hs00222677_m1                    |                                  |
|                    |                           | <b>Forward primer (5' to 3')</b> | <b>Reverse Primer (5' to 3')</b> |
| <i>ACAA2</i>       | NM_006111                 | CAGGGAATGCATCGGGTGTGA            | GCCACAATTCTTGCCAGTG              |
| <i>ACOT12</i>      | NM_130767                 | TGCTCAAGTGGATCGACACC             | TCCAACCTAGCTGTCTCCTCA            |
| <i>ACOX1</i>       | NM_004035                 | CTTCAACCCGGAGCTGCTTA             | ATGTTCTCGATCCGGCG                |
| <i>ACOX2</i>       | NM_003500                 | ACAGAGGGGAGCCAGGTTCTT            | ATCCCCCAATGACACTCGGT             |
| <i>CPT1A</i>       | NM_001876                 | CTTTGGACCGGTTGCTGATG             | GTGCCTTCCAAAGCGATGAG             |
| <i>CYP1A2</i>      | NM_000761.4               | AGCACCTGCCTCTACAGTTGG            | TTTTCAGGCCTTTGGGGACC             |
| <i>CYP2B6</i>      | NM_000767                 | AGCTTCATGACCGAGCCAAA             | CTGTGTCCTTGGGGATGATGT            |
| <i>CYP2E1</i>      | NM_000773.3               | ACTCCCTGGCTCCAGCTTTA             | TCTCTGTCCCCGCAAAGAAC             |
| <i>CYP3A4</i>      | NM_017460.5               | TACCCAATAAGGCACCACCC             | AATGTGCAGGAAAGCATCTGA            |
| <i>EHHADH</i>      | NM_001966                 | AAAAGTGGTTTGCCTGACGG             | AAGTCGTA CTGATCGCGTTG            |
| <i>HADHA</i>       | NM_000182                 | GGAGGACTTGAGGTTGCCAT             | TAAGGCCCCCAGCAAACTT              |
| <i>HADHB</i>       | NM_000183                 | CCCCAGCTGTCCAGACCAA              | CCGATGCAACAACCCGTAA              |
| <i>NROB2 (SHP)</i> | NM_021969                 | GTGGCTTCATGCTGTCTGG              | CTGGCACATCGGGGTTGA               |
| <i>PLIN2</i>       | NM_001122                 | GGCGAGGCGGGGTTTATAG              | CCCACTCGGTTGTGGATCA              |

**Supplemental Table 2. Customized PCR array genes, functional classifications, and treatment-induced fold changes.**

| Gene Symbol                               | Gene Name                                                   | FOH  | OA   | OA+ FOH | CITCO | GW4064 | GW7647 | OA+ CITCO | OA+ GW4064 | OA+ GW7647 |
|-------------------------------------------|-------------------------------------------------------------|------|------|---------|-------|--------|--------|-----------|------------|------------|
| <b>Fatty Acid Uptake/Transport</b>        |                                                             |      |      |         |       |        |        |           |            |            |
| <i>CD36</i>                               | CD36 molecule (thrombospondin receptor)                     | 1.1  | 1.6  | 1.2     | -1.4  | -1.1   | 3.3    | 1.6       | 1.3        | 5.1        |
| <i>FABP1</i>                              | Fatty acid binding protein 1, liver                         | 1.9  | -1.3 | 1.2     | -1.0  | -1.7   | 2.8    | 1.4       | -3.7       | 1.8        |
| <i>LIPC</i>                               | Lipase, hepatic                                             | 1.3  | -1.1 | -1.0    | -1.2  | -2.4   | 1.2    | 1.5       | -4.0       | 1.1        |
| <i>SCP2</i>                               | Sterol carrier protein 2                                    | 1.2  | -1.1 | -1.1    | -1.0  | 1.1    | 1.0    | 1.2       | -1.9       | -1.2       |
| <i>SLC27A1</i>                            | Solute carrier family 27 (fatty acid transporter), member 1 | -1.2 | -1.2 | 1.3     | 1.1   | 1.1    | 1.0    | -1.6      | -3.1       | -1.3       |
| <i>SLC27A2</i>                            | Solute carrier family 27 (fatty acid transporter), member 2 | 1.7  | -1.2 | 1.1     | 1.2   | 1.3    | 2.2    | 1.8       | -1.4       | 1.4        |
| <b>Mitochondrial Fatty Acid Oxidation</b> |                                                             |      |      |         |       |        |        |           |            |            |
| <i>ACAA1</i>                              | Acetyl-CoA acyltransferase 1                                | -1.1 | -1.0 | 1.3     | 1.0   | -1.1   | 2.0    | -1.2      | 1.1        | 1.6        |
| <i>ACAA2</i>                              | Acetyl-CoA acyltransferase 2                                | 1.3  | 1.3  | 1.7     | -1.1  | 1.1    | 2.0    | 1.7       | -1.4       | 1.9        |
| <i>ACADL</i>                              | Acyl-CoA dehydrogenase, long chain                          | 1.1  | -1.1 | -1.1    | -1.2  | -1.4   | -1.2   | 1.1       | -2.3       | -1.3       |
| <i>ACADM</i>                              | Acyl-CoA dehydrogenase, C-4 to C-12 straight chain          | 1.2  | 1.1  | 1.3     | -1.1  | -1.3   | 1.3    | 1.1       | -2.1       | 1.2        |
| <i>ACADS</i>                              | Acyl-CoA dehydrogenase, C-2 to C-3 short chain              | 1.4  | 1.3  | 2.2     | 1.4   | 1.3    | 2.5    | 1.4       | -2.4       | 1.8        |
| <i>ACADVL</i>                             | Acyl-CoA dehydrogenase, very long chain                     | 1.0  | 1.1  | 1.1     | 1.1   | 1.2    | 1.8    | 1.0       | -1.3       | 1.5        |
| <i>ACAT1</i>                              | Acetyl-CoA Acetyltransferase 1                              | 1.3  | 1.1  | 1.1     | -1.1  | -1.4   | 1.1    | 1.5       | -2.2       | 1.0        |
| <i>ACSL3</i>                              | Acyl-CoA synthetase long-chain family member 3              | 1.2  | -1.2 | -1.1    | 1.0   | 1.3    | 1.5    | 1.1       | -1.4       | 1.2        |
| <i>ACSL4</i>                              | Acyl-CoA synthetase long-chain family member 4              | -1.1 | -1.0 | 1.4     | 1.2   | -1.0   | 1.7    | -1.1      | -2.5       | 1.3        |
| <i>ACSL5</i>                              | Acyl-CoA synthetase long-chain family member 5              | 1.2  | 1.1  | 1.5     | 1.1   | 1.6    | 1.8    | 1.3       | -1.2       | 1.6        |
| <i>CPT1A</i>                              | Carnitine palmitoyltransferase 1A (liver)                   | 1.1  | 1.2  | 1.7     | 1.2   | 1.1    | 1.8    | 1.2       | -1.7       | 1.6        |
| <i>CPT2</i>                               | Carnitine palmitoyltransferase 2                            | -1.0 | -1.1 | 1.1     | 1.4   | 1.2    | 2.0    | -1.3      | -1.9       | 1.3        |
| <i>DECRI</i>                              | 2,4-dienoyl CoA reductase 1, mitochondrial                  | 1.2  | -1.2 | -1.4    | -1.0  | 1.0    | 1.1    | 1.3       | -1.6       | -1.1       |

| Gene Symbol                                            | Gene Name                                                                                                                   | FOH  | OA   | OA+ FOH | CITCO | GW4064 | GW7647 | OA+ CITCO | OA+ GW4064 | OA+ GW7647 |
|--------------------------------------------------------|-----------------------------------------------------------------------------------------------------------------------------|------|------|---------|-------|--------|--------|-----------|------------|------------|
| <i>ECHS1</i>                                           | Enoyl CoA hydratase, short chain, 1, mitochondrial                                                                          | -1.1 | -1.0 | 1.1     | 1.1   | 1.0    | 1.3    | -1.1      | -2.0       | -1.1       |
| <i>HADH</i>                                            | Hydroxyacyl-CoA dehydrogenase<br>Hydroxyacyl-CoA                                                                            | 1.2  | -1.0 | 1.0     | -1.0  | -1.0   | 1.4    | 1.3       | -2.1       | 1.2        |
| <i>HADHA</i>                                           | dehydrogenase/3-ketoacyl-CoA<br>thiolase/enoyl-CoA hydratase<br>(trifunctional protein), alpha<br>subunit                   | 1.1  | 1.2  | 1.3     | 1.1   | 1.1    | 2.3    | 1.4       | -1.3       | 2.1        |
| <i>HADHB</i>                                           | Hydroxyacyl-CoA<br>dehydrogenase/3-ketoacyl-CoA<br>thiolase/enoyl-CoA hydratase<br>(trifunctional protein), beta<br>subunit | 1.3  | 1.6  | 1.5     | 1.1   | 1.0    | 2.5    | 1.9       | -1.0       | 2.3        |
| <i>SLC24A20</i>                                        | Solute carrier family 25<br>(carnitine/acylcarnitine<br>translocase), member 20                                             | -1.0 | 1.2  | 1.3     | 1.2   | -1.0   | 2.0    | 1.2       | -1.5       | 1.7        |
| <b><u>Peroxisomal <math>\beta</math>-Oxidation</u></b> |                                                                                                                             |      |      |         |       |        |        |           |            |            |
| <i>ACOT4</i>                                           | Acyl-CoA thioesterase 4                                                                                                     | 1.1  | -1.2 | -1.0    | 1.3   | 1.1    | 1.3    | 1.3       | -1.7       | 1.4        |
| <i>ACOT8</i>                                           | Acyl-CoA thioesterase 8                                                                                                     | -1.2 | -1.1 | 1.2     | 1.2   | 1.1    | 1.1    | -1.3      | -2.2       | -1.2       |
| <i>ACOX1</i>                                           | Acyl-CoA oxidase 1, palmitoyl                                                                                               | 1.1  | -1.1 | 1.3     | 1.2   | 1.0    | 1.4    | -1.0      | -2.1       | 1.3        |
| <i>ACOX2</i>                                           | Acyl-CoA oxidase 2, branched<br>chain                                                                                       | 1.7  | -1.4 | -1.2    | 1.0   | -2.9   | 1.3    | 1.1       | -6.6       | -1.3       |
| <i>ECHI</i>                                            | Enoyl CoA hydratase 1,<br>peroxisomal                                                                                       | 1.3  | -1.0 | -1.0    | -1.0  | -1.2   | 1.6    | -1.1      | -2.0       | -1.1       |
| <i>EHHADH</i>                                          | Enoyl-CoA, hydratase/3-<br>hydroxyacyl CoA dehydrogenase                                                                    | -1.0 | -1.0 | 1.2     | 1.1   | -1.2   | 1.3    | -1.1      | -2.7       | 1.0        |
| <b><u>Microsomal <math>\omega</math>-Oxidation</u></b> |                                                                                                                             |      |      |         |       |        |        |           |            |            |
| <i>CYP2E1</i>                                          | Cytochrome P450, family 2,<br>subfamily E, polypeptide 1                                                                    | -1.4 | 1.3  | 2.2     | -1.0  | -6.0   | -1.1   | 1.4       | -9.6       | -1.1       |
| <i>CYP4A11</i>                                         | Cytochrome P450, family 4,<br>subfamily A, polypeptide 11                                                                   | -1.0 | -1.1 | 1.1     | -1.1  | -1.8   | 2.1    | -1.1      | -3.0       | 1.4        |
| <b><u>Fatty Acid Biosynthesis</u></b>                  |                                                                                                                             |      |      |         |       |        |        |           |            |            |
| <i>ACACA</i>                                           | Acetyl-CoA carboxylase alpha                                                                                                | -1.2 | -1.2 | 1.2     | -1.0  | -1.0   | -1.0   | -1.4      | -2.4       | -1.2       |
| <i>ACACB</i>                                           | Acetyl-CoA carboxylase beta                                                                                                 | 1.0  | -1.2 | 1.1     | 1.1   | 1.2    | 1.0    | -1.5      | -2.4       | 1.1        |
| <i>ACLY</i>                                            | ATP citrate lyase                                                                                                           | 1.0  | -1.2 | 1.1     | 1.1   | 1.2    | 1.0    | -1.2      | -2.0       | -1.1       |
| <i>ELOVL1</i>                                          | ELOVL fatty acid elongase 1                                                                                                 | 1.1  | 1.0  | -1.2    | 1.3   | 1.4    | 1.4    | 1.1       | -1.2       | 1.1        |

| Gene Symbol                          | Gene Name                                       | FOH  | OA   | OA+ FOH | CITCO | GW4064 | GW7647 | OA+ CITCO | OA+ GW4064 | OA+ GW7647 |
|--------------------------------------|-------------------------------------------------|------|------|---------|-------|--------|--------|-----------|------------|------------|
| <i>ELOVL5</i>                        | ELOVL fatty acid elongase 5                     | -1.1 | -1.1 | 1.0     | 1.1   | 1.2    | 1.3    | 1.0       | -1.6       | 1.2        |
| <i>ELOVL6</i>                        | ELOVL fatty acid elongase 6                     | 1.0  | 1.1  | 1.4     | 1.3   | 1.2    | 1.2    | -1.2      | -1.8       | 1.2        |
| <i>FASN</i>                          | Fatty acid synthase                             | 1.1  | -1.2 | 1.3     | 1.1   | 1.1    | 1.1    | -1.2      | -2.4       | 1.4        |
| <i>MCAT</i>                          | Malonyl CoA:ACP acyltransferase (mitochondrial) | -1.2 | 1.0  | 1.2     | 1.2   | -1.0   | 1.1    | -1.5      | -2.0       | -1.1       |
| <i>MECR</i>                          | Mitochondrial trans-2-enoyl-CoA reductase       | -1.0 | 1.0  | -1.1    | 1.1   | 1.2    | 1.3    | 1.0       | -1.6       | 1.1        |
| <i>PECR</i>                          | Peroxisomal trans-2-enoyl-CoA reductase         | -1.1 | -1.3 | -1.2    | 1.2   | -1.1   | 1.1    | -1.2      | -2.5       | -1.3       |
| <i>SCD</i>                           | Stearoyl-CoA desaturase                         | 1.2  | -2.0 | -1.4    | 1.2   | -1.4   | 1.6    | -2.0      | -6.2       | -1.5       |
| <i>SCD5</i>                          | Stearoyl-CoA desaturase 5                       | -1.2 | -1.4 | -1.3    | 1.1   | 1.2    | 1.2    | -1.2      | -2.1       | -1.3       |
| <i>TECR</i>                          | Trans-2,3-enoyl-CoA reductase                   | -1.1 | -1.1 | 1.0     | 1.1   | 1.1    | 1.2    | 1.1       | -1.7       | 1.1        |
| <b>Fatty Acid Metabolism (Other)</b> |                                                 |      |      |         |       |        |        |           |            |            |
| <i>ACAT2</i>                         | Acetyl-CoA Acetyltransferase 2                  | 1.3  | 1.1  | 1.1     | -1.1  | -1.0   | -1.1   | 1.4       | -1.6       | 1.0        |
| <i>ACOT1</i>                         | Acyl-CoA thioesterase 1                         | 1.1  | 1.1  | 1.3     | 1.4   | 1.2    | 1.6    | -1.1      | -2.0       | 1.1        |
| <i>ACOT6</i>                         | Acyl-CoA thioesterase 6                         | -1.1 | -1.1 | -1.3    | -1.3  | -1.6   | -1.2   | 1.5       | -8.6       | -1.2       |
| <i>ACOT7</i>                         | Acyl-CoA thioesterase 7                         | 1.0  | -1.1 | -1.2    | 1.3   | 1.4    | 1.2    | 1.3       | -1.4       | 1.2        |
| <i>ACOT12</i>                        | Acyl-CoA thioesterase 12                        | 1.6  | 1.8  | 3.9     | 1.1   | -1.6   | 1.3    | 2.0       | -2.6       | 1.6        |
| <i>COX10</i>                         | Cytochrome C oxidase assembly homolog 10        | -1.3 | -1.1 | 1.1     | 1.2   | 1.1    | 1.3    | -1.0      | -2.0       | 1.2        |
| <b>Triglyceride Biosynthesis</b>     |                                                 |      |      |         |       |        |        |           |            |            |
| <i>LPIN1</i>                         | Lipin 1                                         | -1.2 | -1.1 | 1.3     | -1.0  | -1.3   | 1.1    | -1.1      | -2.8       | 1.0        |
| <i>LPIN2</i>                         | Lipin 2                                         | -1.1 | -1.2 | 1.2     | -1.0  | -1.4   | 1.0    | -1.3      | -4.3       | -1.2       |
| <i>LPIN3</i>                         | Lipin 3                                         | -1.3 | -1.3 | 1.1     | -1.2  | -1.4   | -1.2   | -1.3      | -3.4       | -1.2       |
| <i>AGPAT1</i>                        | 1-acylglycerol-3-phosphate O-acyltransferase 1  | -1.1 | -1.1 | -1.3    | 1.3   | 1.6    | 1.4    | -1.0      | -1.4       | -1.1       |
| <i>AGPAT2</i>                        | 1-acylglycerol-3-phosphate O-acyltransferase 2  | 1.0  | 1.4  | 1.2     | 1.5   | 1.7    | 2.2    | 1.7       | 1.0        | 1.7        |
| <i>AGPAT6</i>                        | 1-acylglycerol-3-phosphate O-acyltransferase 6  | -1.2 | 1.0  | 1.4     | 1.0   | 1.2    | 1.1    | -1.0      | -2.1       | 1.1        |
| <i>AGPAT9</i>                        | 1-acylglycerol-3-phosphate O-acyltransferase 9  | -1.2 | 1.3  | 1.2     | 1.3   | 1.4    | 1.4    | 1.1       | -1.5       | 1.7        |
| <i>DGAT1</i>                         | Diacylglycerol O-acyltransferase 1              | -1.3 | -1.2 | -1.0    | -1.0  | -2.0   | 1.1    | -1.2      | -3.0       | -1.2       |
| <i>DGAT2</i>                         | Diacylglycerol O-acyltransferase 2              | -1.1 | 1.1  | 1.3     | 1.2   | -1.4   | 1.3    | -1.1      | -3.0       | 1.0        |

| Gene Symbol                           | Gene Name                                                | FOH  | OA   | OA+ FOH | CITCO | GW4064 | GW7647 | OA+ CITCO | OA+ GW4064 | OA+ GW7647 |
|---------------------------------------|----------------------------------------------------------|------|------|---------|-------|--------|--------|-----------|------------|------------|
| <i>SREBF1</i>                         | Sterol regulatory element binding transcription factor 1 | -1.1 | -1.6 | -1.0    | 1.1   | -1.2   | 1.2    | -1.8      | -4.9       | -1.7       |
| <i>MTTP</i>                           | Microsomal triglyceride transfer protein large subunit   | -1.0 | -1.3 | -1.1    | 1.2   | -1.3   | -1.1   | -1.1      | -3.6       | -1.4       |
| <b><u>Cholesterol Metabolism</u></b>  |                                                          |      |      |         |       |        |        |           |            |            |
| <i>DHDDS</i>                          | Dehydrololichyl diphosphate synthase complex subunit     | -1.0 | 1.2  | 1.2     | 1.1   | 1.3    | 1.5    | -1.0      | -1.8       | 1.3        |
| <i>FDFTI</i>                          | Farnesyl-diphosphate farnesyltransferase 1               | 1.4  | -1.0 | 1.0     | 1.1   | 1.2    | 1.2    | 1.4       | -1.3       | 1.1        |
| <i>FDPS</i>                           | Farnesyl diphosphate synthase                            | 1.3  | -1.1 | -1.2    | 1.1   | 1.1    | 1.2    | -1.0      | -1.6       | -1.0       |
| <i>FNTA</i>                           | Farnesyltransferase, CAAX box, alpha                     | -1.2 | -1.1 | 1.3     | 1.1   | -1.1   | 1.3    | -1.1      | -2.5       | 1.0        |
| <i>FNTB</i>                           | Farnesyltransferase, CAAX box, beta                      | -1.3 | -1.1 | 1.2     | 1.2   | 1.2    | 1.2    | -1.1      | -2.1       | 1.0        |
| <i>GGPS1</i>                          | Geranylgeranyl diphosphate synthase 1                    | 1.1  | -1.1 | -1.1    | 1.0   | 1.1    | 1.0    | -1.0      | -1.7       | -1.1       |
| <i>HMGCR</i>                          | 3-hydroxy-3-methylglutaryl-CoA reductase                 | 1.1  | 1.2  | 1.4     | 1.1   | 1.3    | 1.1    | 1.3       | -1.1       | 1.4        |
| <i>PDSSI</i>                          | Prenyl (decaprenyl) diphosphate synthase, subunit 1      | 1.4  | 1.2  | 1.0     | -1.1  | -1.3   | 1.0    | 1.6       | -1.7       | 1.1        |
| <i>PPAPDC2</i>                        | Phosphatidic acid phosphatase type 2 domain containing 2 | -1.1 | -1.2 | 1.1     | 1.1   | 1.1    | 1.0    | -1.2      | -2.1       | -1.3       |
| <i>RABGGTA</i>                        | Rab geranylgeranyltransferase, alpha subunit             | -1.1 | -1.2 | -1.4    | 1.2   | 1.2    | 1.2    | 1.1       | -1.5       | -1.1       |
| <i>RABGGTB</i>                        | Rab geranylgeranyltransferase, beta subunit              | 1.2  | -1.2 | -1.3    | -1.1  | -1.0   | 1.1    | 1.4       | -1.5       | -1.0       |
| <b><u>Carbohydrate Metabolism</u></b> |                                                          |      |      |         |       |        |        |           |            |            |
| <i>MLXIPL</i>                         | MLX interacting protein-like                             | -1.1 | -1.2 | -1.5    | 1.3   | -1.7   | 1.0    | -1.3      | -2.8       | -1.4       |
| <i>PCK1</i>                           | Phosphoenolpyruvate carboxykinase 1 (soluble)            | -1.5 | 1.8  | 4.0     | 1.4   | -5.4   | 3.5    | 2.5       | -5.7       | 4.2        |
| <b><u>Inflammation</u></b>            |                                                          |      |      |         |       |        |        |           |            |            |
| <i>IL6</i>                            | Interleukin 6 (interferon, beta 2)                       | -1.1 | -1.9 | 1.1     | -1.0  | -1.0   | -1.3   | -1.5      | -4.5       | -2.6       |
| <b><u>Nuclear Receptors</u></b>       |                                                          |      |      |         |       |        |        |           |            |            |
| <i>NRIH4</i>                          | Nuclear receptor subfamily 1, group H, member 4          | -1.3 | -1.4 | 1.1     | 1.1   | -1.5   | -1.4   | -1.4      | -3.1       | 1.0        |

| Gene Symbol                                                     | Gene Name                                             | FOH  | OA   | OA+ FOH | CITCO | GW4064 | GW7647 | OA+ CITCO | OA+ GW4064 | OA+ GW7647 |
|-----------------------------------------------------------------|-------------------------------------------------------|------|------|---------|-------|--------|--------|-----------|------------|------------|
| <i>NR1I3</i>                                                    | Nuclear receptor subfamily 1, group I, member 3       | 1.0  | -1.0 | 1.2     | 1.0   | -1.5   | 1.1    | -1.2      | -6.3       | -2.8       |
| <i>PPARA</i>                                                    | Peroxisome proliferator-activated receptor alpha      | 1.0  | 1.1  | 1.7     | 1.1   | 1.1    | -1.1   | -1.4      | -2.6       | -1.2       |
| <i>PPARG</i>                                                    | Peroxisome proliferator-activated receptor gamma      | 1.4  | 1.1  | 1.3     | -1.2  | 1.6    | 1.0    | 1.1       | -1.4       | -1.1       |
| <b><u>Nuclear Receptor Target Genes (Positive Controls)</u></b> |                                                       |      |      |         |       |        |        |           |            |            |
| <i>CYP2B6</i>                                                   | Cytochrome P450, family 2, subfamily B, polypeptide 6 | 2.1  | -1.5 | 2.3     | 9.9   | -1.6   | 1.0    | 4.2       | -4.6       | -1.9       |
| <i>NR0B2 (SHP)</i>                                              | Nuclear receptor subfamily 0, group B, member 2       | -1.3 | -1.3 | -1.7    | 1.1   | 5.0    | -1.4   | -1.2      | 2.3        | -1.9       |
| <i>PLIN2</i>                                                    | Perilipin 2                                           | 1.3  | 1.5  | 1.8     | -1.0  | 1.3    | 3.8    | 1.9       | 1.1        | 3.9        |
| <b><u>Apolipoproteins</u></b>                                   |                                                       |      |      |         |       |        |        |           |            |            |
| <i>APOA5</i>                                                    | Apolipoprotein A5                                     | 1.3  | 2.6  | 4.3     | 1.1   | 1.6    | 2.0    | 3.2       | 1.5        | 2.6        |
| <i>APOB</i>                                                     | Apolipoprotein B                                      | -1.0 | -1.5 | 1.1     | -1.1  | -1.4   | -1.2   | -1.4      | -3.7       | -1.3       |
| <i>APOC4</i>                                                    | Apolipoprotein C4                                     | -1.4 | -1.2 | -1.1    | -1.1  | 1.7    | -1.5   | -1.7      | -2.1       | -1.7       |
| <i>APOE</i>                                                     | Apolipoprotein E                                      | 1.1  | -1.1 | 1.1     | -1.0  | -1.2   | 1.1    | -1.2      | -2.0       | -1.3       |

Genes whose expression changed by at least 1.3-fold relative to control in response to farnesol treatment, alone and/or in combination with oleic acid, are indicated by grey shading. Values for the FOH, OA, and OA+FOA treatment groups are the fold changes relative to FF-BSA+ EtOH treated controls. Values for the CITCO, GW4064, GW7647, OA+CITCO, OA+GW4064, and OA+GW7647 treatment groups are the fold changes relative to FF-BSA+ DMSO-treated controls.
